# Supplementary material
Source: publisher figshare collection journal article supplement (https://future-science-group.figshare.com/articles/dataset/_/21444126)

1. Receptor-mediated endocytosis-1
2. CPP mediated intracellular uptake
3. Receptor-mediated endocytosis-2
4. Lysosomal degradation and drug-release

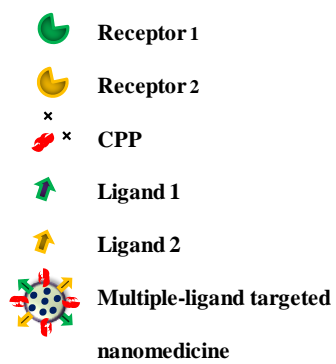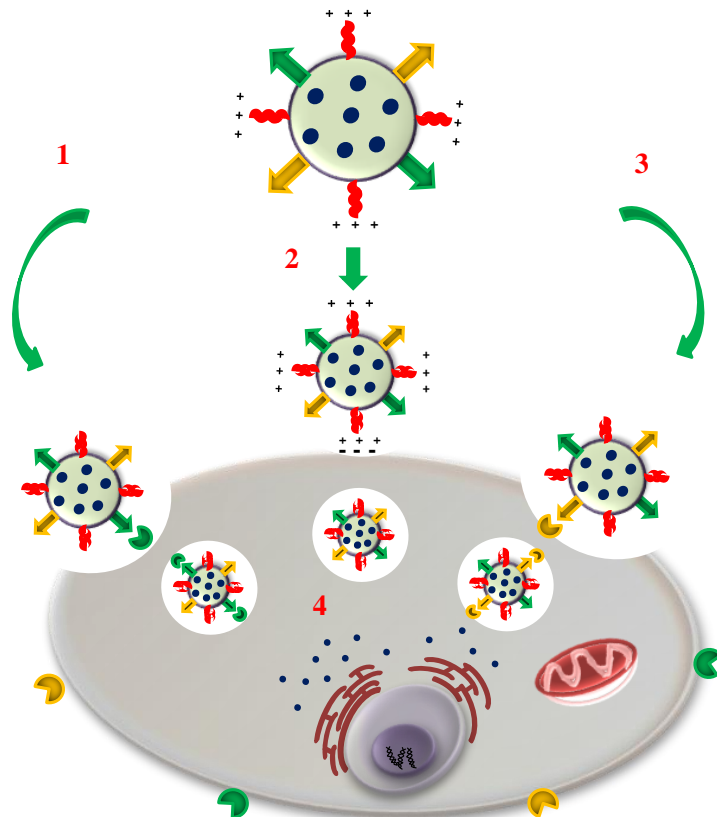

Supplement: Supplementary file 3 [file 1]
